# Supplementary material for: Successful Bacteriophage-Antibiotic Combination Therapy against Multidrug-Resistant Pseudomonas aeruginosa Left Ventricular Assist Device Driveline Infection
Source: MDPI journal article supplement (doi:10.3390/v15051210), 2023-05-20
Supplement: s1 [file s1]

**Table S1.** Phage therapy case reports for LVAD-associated infection treatment

| N | Patient age and gender | Causative agent          | Treatment Type                 | Phage(s) used                                                                                                                                                                                                                                                                                                         | Treatment modality                                                                                                                                                            | Length of phage treatment | Adverse Events     | Outcome, notes                                                                                                                                                                                         | City, country              | Publication          |
|---|------------------------|--------------------------|--------------------------------|-----------------------------------------------------------------------------------------------------------------------------------------------------------------------------------------------------------------------------------------------------------------------------------------------------------------------|-------------------------------------------------------------------------------------------------------------------------------------------------------------------------------|---------------------------|--------------------|--------------------------------------------------------------------------------------------------------------------------------------------------------------------------------------------------------|----------------------------|----------------------|
| 1 | 65-year-old male       | MSSA                     | Antibacterial and phage        | AB-SA01 Cocktail consisting of 3 lytic <i>S. aureus</i> phages (Myoviruses)                                                                                                                                                                                                                                           | I/v q12 (3 x 10 <sup>9</sup> PFU/ml)                                                                                                                                          | 28 days                   | No adverse events  | Clinical cure, bacterial persistence<br>* One week after phage therapy, the patient underwent successful heart transplantation; 7 months after transplantation, there was no recurrence of infection.  | San Diego, California, USA | Aslam, 2019 [12]     |
| 2 | 67-year-old male       | MSSA                     | Surgical, phage, antibacterial | Commercial phage product PYO phage cocktail consisting of Myoviruses Sb-1 and ISP active against <i>Staphylococcus</i> spp., <i>Streptococcus</i> spp., <i>Proteus</i> spp., <i>P. aeruginosa</i> , and <i>E. coli</i> and Staphylococcal phage Sb-1 (Myovirus) active against <i>Staphylococcus</i> spp. from ELIAVA | Topical application (1:1) of PYO) 10 <sup>6</sup> PFU/ml, 5 ml) and Sb-1 (10 <sup>7</sup> PFU/ml, 5ml) during surgery and through the drainage system in the surgical site q8 | 10 days                   | Mild nausea.       | Clinical cure, bacterial eradication.                                                                                                                                                                  | Berlin, Germany            | Mulzer, 2019 [8]     |
| 3 | 61-year-old male       | <i>S. aureus</i>         | Antibacterial and phage        | Myovirus CH1 against <i>S. aureus</i>                                                                                                                                                                                                                                                                                 | Topical application through a chest tube inserted during surgery (1 x 10 <sup>9</sup> PFU/ml, 20 ml) q12                                                                      | 7 days                    | No adverse events. | Clinical cure, bacterial eradication.<br>*20 months later, the patient died from heart transplant failure.                                                                                             | Hannover, Germany          | Rubalskii, 2020 [13] |
| 4 | 51-year-old male       | <i>S. aureus</i>         | Antibacterial and phage        | Four phages against <i>S. aureus</i> – Myoviruses CH1, Sa30, SCH1, and SC111                                                                                                                                                                                                                                          | Intra nasal 2 ml q24, oral 10 – 20 ml q24, topical through drainage 10 ml q24 (8 days), 10 – 20 ml q12 (6 days) (1 x 10 <sup>9</sup> PFU/ml)                                  | 14 days                   | No adverse events. | Treatment failure, the patient died 1.5 months later of <i>S. aureus</i> sepsis.<br>* <i>S. aureus</i> eradication was observed from the nose and throat, decrease in bacterial load in drainage fluid | Hannover, Germany          | Rubalskii, 2020 [13] |
| 5 | 60-year-old male       | MDR <i>P. aeruginosa</i> | Antibacterial and phage        | GD-1, consisting of 3 phages                                                                                                                                                                                                                                                                                          | I/v q8 (1.9 x 10 <sup>7</sup> PFU/ml)                                                                                                                                         | 6 weeks                   | No adverse events. | Treatment failure, development of bacteremia in the second                                                                                                                                             | San Diego, California, USA | Aslam, 2020 [9]      |

|   |                  |                                   |                                    |                                                                                                                                                                                                                                      |                                                                                                                                                                                                               |                                              |                                                                                                                                                                                                           |                                                                                                                                                                            |                            |                          |
|---|------------------|-----------------------------------|------------------------------------|--------------------------------------------------------------------------------------------------------------------------------------------------------------------------------------------------------------------------------------|---------------------------------------------------------------------------------------------------------------------------------------------------------------------------------------------------------------|----------------------------------------------|-----------------------------------------------------------------------------------------------------------------------------------------------------------------------------------------------------------|----------------------------------------------------------------------------------------------------------------------------------------------------------------------------|----------------------------|--------------------------|
|   |                  |                                   |                                    |                                                                                                                                                                                                                                      |                                                                                                                                                                                                               |                                              |                                                                                                                                                                                                           | week of treatment, and discharge from the driveline after treatment.<br>*Phage-specific neutralising serum developed during bacteremia in the second treatment week.       |                            |                          |
| 6 | 82-year-old male | <i>P. aeruginosa</i>              | Surgical, phage, antibacterial     | Episode 1: SDSU1 (2 phages PAK-P and E217) SDSU2(2 phages PAK_P1, PAK_P5) cocktails.<br><br>Episode 2: PPM3 (4 phages) cocktail.                                                                                                     | Episode 1: I/v q8 (2 x 10 <sup>5</sup> PFU/ml) q12 (7.58 x 10 <sup>5</sup> and 4 x 10 <sup>10</sup> PFU/ml). Single topical application during surgery<br><br>Episode 2: I/v q12 (1 x 10 <sup>9</sup> PFU/ml) | Episode 1: 73 days<br><br>Episode 2: 4 weeks | Fever, wheezing, and shortness of breath using SDSU1 phage at a concentration of 1 x 10 <sup>11</sup> PFU/ml. The phage was well tolerated when the concentration was reduced to 10 <sup>10</sup> PFU/ml. | Treatment failure developed recurrent bacteremia during episode 1 in the last week of treatment. During episode 2, bacteremia was present in the fourth week of treatment. | San Diego, California, USA | Aslam, 2020 [9]          |
| 7 | 53-year-old male | MDR <i>P. aeruginosa</i>          | Surgical, antibacterial, and phage | Three lytic PA phages (Podovirus PNM; Myoviruses PT07 and 14/1)                                                                                                                                                                      | I/v 7h infusion (10 <sup>7</sup> PFU/ml, 10 ml/h)<br><br>Topical q12h (10 <sup>8</sup> PFU/ml, 50 ml) by dressing and directly on the wound during surgery                                                    | 5 days                                       | Increase in gamma-glutamyl transferase (GGT) and direct bilirubin. After the reduction in phage dosage (0.5 log PFU/ml from initial titer), liver damage markers did not increase.                        | Clinical cure, bacterial eradication.<br>*4 months later, the patient died from a noninfectious cause.                                                                     | Berlin, Germany            | Tkhilaishvili, 2021 [10] |
| 8 | 68-year-old male | MDR <i>P. aeruginosa</i>          | Antibacterial and phage            | Autophage and Pyo phage cocktail from ELIAVA                                                                                                                                                                                         | Topical (dressing) application of Autophage (10 <sup>8</sup> PFU/ml) and Pyo (10 <sup>6</sup> PFU/ml) q12                                                                                                     | 12 days Autophage and 5 days Pyo             | No information available.                                                                                                                                                                                 | Recurrence of <i>P. aeruginosa</i> infection with development of phage resistance.                                                                                         | Berlin, Germany            | Tkhilaishvili, 2022 [14] |
| 9 | 57-year-old male | MSSA and <i>Proteus mirabilis</i> | Surgical, phage                    | SniPha 360 commercial cocktail of lytic phages against <i>Escherichia coli</i> , <i>Staphylococcus aureus</i> , <i>Pseudomonas aeruginosa</i> , <i>Streptococcus pyogenes</i> , <i>Proteus vulgaris</i> and <i>Proteus mirabilis</i> | Single topical application during surgery of viscous phage-containing fluid (20 mL SniPha 360 (1 x 10 <sup>7</sup> PFU/ml) mixed                                                                              | 1 day (single application)                   | No information available.                                                                                                                                                                                 | Recurrence of MSSA infection 2 months later, eradication of <i>P. mirabilis</i> .<br>* <i>in vitro</i> testing of the phage cocktail showed lytic activity only against    | Rostock, Germany           | Püschel, 2022 [15]       |

|    |                  |      |                                |                                |                                                                                                                                          |                            |                           |                                                                        |                 |                  |
|----|------------------|------|--------------------------------|--------------------------------|------------------------------------------------------------------------------------------------------------------------------------------|----------------------------|---------------------------|------------------------------------------------------------------------|-----------------|------------------|
|    |                  |      |                                |                                | with saline and polysaccharide                                                                                                           |                            |                           | <i>P. mirabilis</i> ; no lytic effect was observed on <i>S. aureus</i> |                 |                  |
| 10 | 51-year-old male | MSSA | Surgical, phage, antibacterial | SniPha 360 commercial cocktail | Single topical application during surgery of viscous phage-containing hydrophilic galenic (20 mL SniPha 360 (1 × 10 <sup>7</sup> PFU/ml) | 1 day (single application) | No information available. | Recurrence of MSSA infection 6 months later.                           | Bochum, Germany | Rojas, 2022 [11] |

MDR – multidrug-resistant; MSSA – methicillin-sensitive *Staphylococcus aureus*; AB-SA01 - AmpliPhi Biosciences Corporation

#### Biofilm formation of used bacterial strains.

The isolated bacterial strain PAP01 was a weak biofilm producer; however, the reference strain was a strong biofilm producer already after 2 h of incubation. There were significant differences between both strains at all incubation times,  $p < 0.0001$ , with regard to the formation of the biofilm (Figure S2).

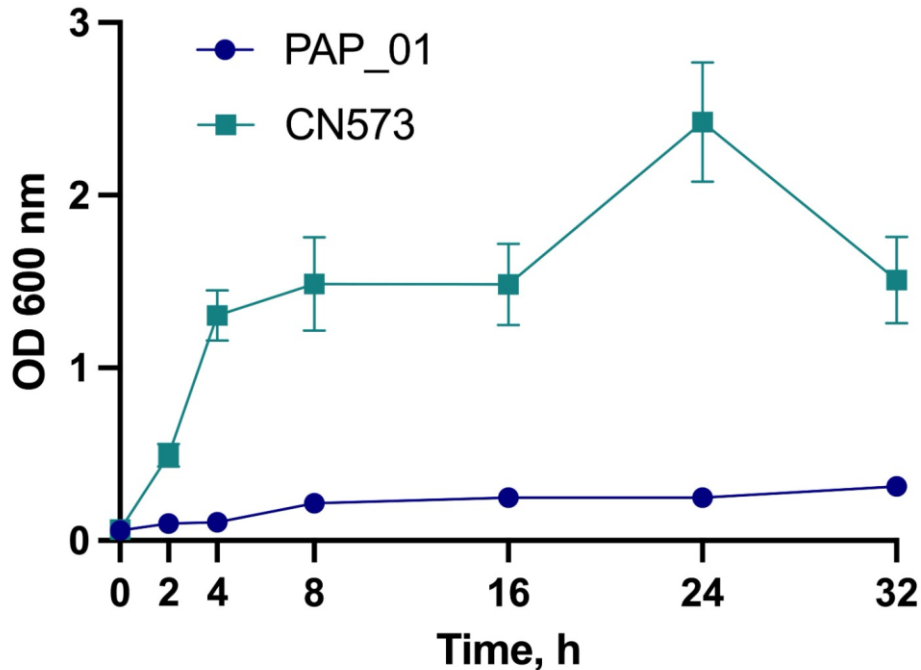

**Figure S1.** Biofilm formation of *P. aeruginosa* PAP01 and CN573 strains using crystal violet assay.

#### Phage effect against planktonic cells, biofilm eradication, prevention of biofilm formation, and bacterial resistance to phages in CN573

In the biofilm eradication model by strain CN573, the effect of phages PNM and PT07 and both combined showed a significant absence of growth in planktonic cells at all concentrations tested after 12 and 24 h, and showed a significant eradication of biofilms (Figure S3). The results show that in some cases, the suppression of bacterial planktonic cell growth after 12 h was less when higher concentrations of phages were applied. However, this was not observed in planktonic cells after 24 h, nor for biofilm eradication. When applying both phages together, there were no concentration dependent differences in the bacterial growth curves and MBEC values. The selection of phage resistance was observed only in MBEC plate, and only against PNM phage at  $10^7$  PFU/ml (Figure S3 C).

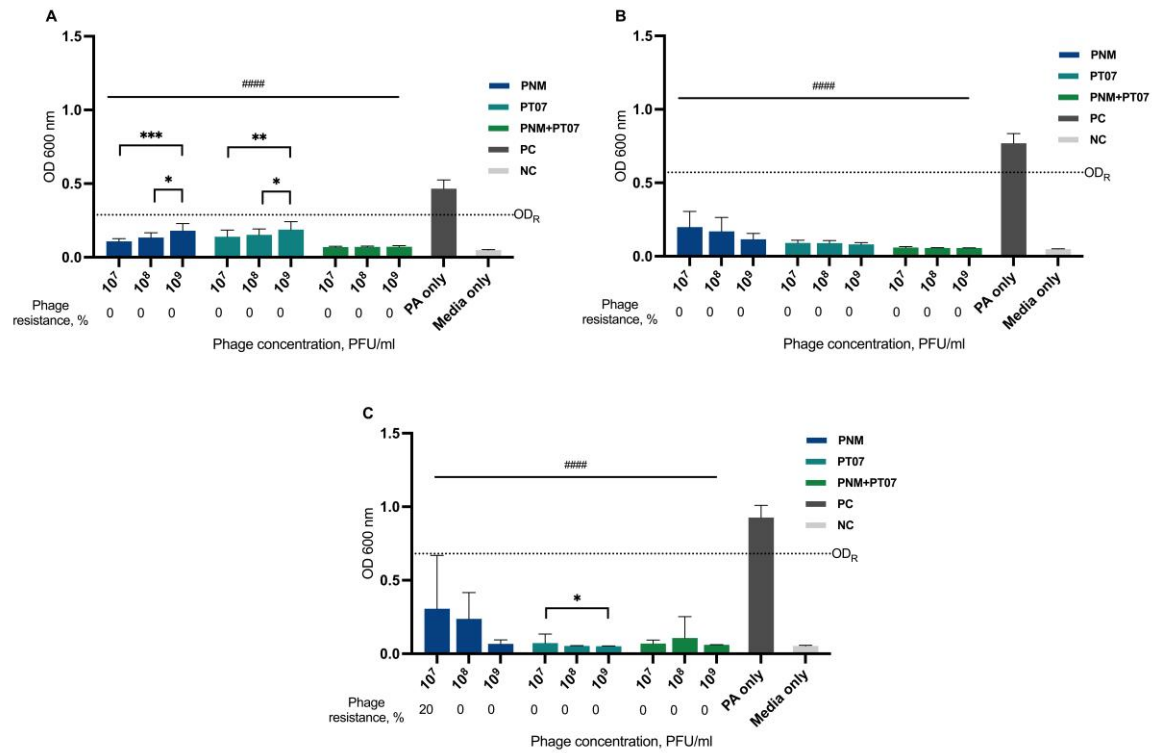

**Figure S2.** Bacterial growth suppression and MBEC of PNM, PT07, or both combined, against CN573 in a biofilm eradication model. The bars represent mean values + standard deviations. The number of phage-resistant strains in % is represented below the bars. (A) Bacterial growth suppression after 12 h; (B) Bacterial growth suppression after 24 h; (C) MBEC; PC – positive control, untreated CN573; NC – negative control, media only; ODR line represents the cut-off value to determine phage resistance; Bars with a hash sign are statistically different from the positive control, and bars with an asterisk represent the statistical difference between concentrations of the same phage; \*/# p-value < 0.05, \*\*/## p-value < 0.01, \*\*\*/### p-value < 0.001 and \*\*\*\*/#### p-value < 0.0001.
